# Supplementary material
Source: MDPI journal article supplement (https://www.mdpi.com/2071-1050/14/9/5505)
Supplement: s1 [file s1 › sustainability-1698304-supplementary.pdf]

# Supplementary Information

**Table S1.** Demographics of respondents (N = 211).

| Demographics                    |                       | Frequency | Percent |
|---------------------------------|-----------------------|-----------|---------|
| Gender                          | Male                  | 133       | 63.1%   |
|                                 | Female                | 78        | 36.9%   |
| Age                             | 15~29 s               | 57        | 27.0%   |
|                                 | 30~39 s               | 79        | 37.4%   |
|                                 | 40~49 s               | 42        | 19.9%   |
|                                 | 50~59 s               | 25        | 11.8%   |
|                                 | 60 s and above        | 8         | 3.8%    |
| Education                       | No schooling          | 11        | 5.2%    |
|                                 | Primary School        | 67        | 31.8%   |
|                                 | Junior High School    | 80        | 37.9%   |
|                                 | Senior High School    | 40        | 18.9%   |
|                                 | University and higher | 13        | 6.2%    |
| Ethnic type                     | Dai                   | 117       | 55.5%   |
|                                 | Jinuo                 | 16        | 7.6%    |
|                                 | Hani                  | 75        | 35.5%   |
|                                 | Han                   | 3         | 1.4%    |
| Occupation                      | Farmer                | 158       | 74.9%   |
|                                 | Student               | 13        | 6.2%    |
|                                 | Own business          | 20        | 9.48%   |
|                                 | Other                 | 20        | 9.48%   |
| Annual family income (CNY yuan) | <20000                | 49        | 23.2%   |
|                                 | 20,000–39,999         | 82        | 38.8%   |
|                                 | 40,000–59,999         | 42        | 19.9%   |
|                                 | >60,000               | 38        | 18%     |

We first performed factor analysis. In terms of content validity, the KMO value of sampling adequacy was 0.799 ( $>0.5$ ) and the P-value of Bartlett's test of sphericity reached significant level of 0.01, indicating that the questionnaire met the validity criteria. Then, reliability analysis was also conducted, and results showed that the reliability levels of all latent variables were greater than 0.5, except for low internal aggregation of latent variables for Economics. Therefore, field samples satisfied model analysis. It should be noted that the use of Cronbach's alpha also has its limits when it comes to measuring the consistency of variables [1]. Secondly, the low value of Economic indicator may be due to the effect of E2 classified by the area of villagers' land owned.

**Table S2.** Reliability and validity tests of constructs.

| Variables        | Item | Standard Loadings | Cronbach's Alpha | Composite Reliability |
|------------------|------|-------------------|------------------|-----------------------|
| Economics        | E1   | 0.97              | 0.07             | 0.577                 |
|                  | E2   | 0.22              |                  |                       |
| External factors | EF1  | 0.85              | 0.80             | 0.87                  |
|                  | EF2  | 0.81              |                  |                       |
|                  | EF3  | 0.82              | 0.67             | 0.74                  |
|                  | A1   | 0.71              |                  |                       |

|                                       |      |      |      |      |
|---------------------------------------|------|------|------|------|
| Awareness of the two mountains theory | A2   | 0.70 |      |      |
|                                       | A3   | 0.74 |      |      |
|                                       | A4   | 0.43 |      |      |
|                                       | AES1 | 0.57 |      |      |
| Attitude towards ecosystem services   | AES2 | 0.51 |      |      |
|                                       | AES3 | 0.73 | 0.76 | 0.77 |
|                                       | AES4 | 0.82 |      |      |
|                                       | AES5 | 0.50 |      |      |
| Willingness to conserve nature        | W1   | 0.76 |      |      |
|                                       | W2   | 0.52 | 0.50 | 0.53 |
|                                       | W3   | 0.21 |      |      |

**Table S3.** Multiple comparisons of ANOVA on willingness to conserve across age, income, and education scales.

| Test method   | Age (I) | Age (J)       | Mean difference(I-J) | Std. error | Sig.  |
|---------------|---------|---------------|----------------------|------------|-------|
| LSD           | 1       | 2             | −0.055               | 0.138      | 0.690 |
|               |         | 3             | 0.210                | 0.1618     | 0.194 |
|               |         | 4             | 0.551 **             | 0.190      | 0.004 |
|               |         | 5             | 0.382                | 0.299      | 0.202 |
|               | 2       | 1             | 0.055                | 0.138      | 0.690 |
|               |         | 3             | 0.265                | 0.151      | 0.082 |
|               |         | 4             | 0.606 ***            | 0.182      | 0.001 |
|               |         | 5             | 0.437                | 0.294      | 0.138 |
|               | 3       | 1             | −0.210               | 0.161      | 0.194 |
|               |         | 2             | −0.265               | 0.151      | 0.082 |
|               |         | 4             | 0.341                | 0.200      | 0.090 |
|               |         | 5             | 0.173                | 0.305      | 0.573 |
|               | 4       | 1             | −0.551 **            | 0.190      | 0.004 |
|               |         | 2             | −0.606 ***           | 0.182      | 0.001 |
|               |         | 3             | −0.341               | 0.200      | 0.090 |
|               |         | 5             | −0.168               | 0.322      | 0.601 |
|               | 5       | 1             | −0.382               | 0.299      | 0.202 |
|               |         | 2             | −0.437               | 0.294      | 0.138 |
|               |         | 3             | −0.173               | 0.305      | 0.573 |
|               |         | 4             | 0.168                | 0.322      | 0.601 |
| Education (I) |         | Education (J) |                      |            |       |
| Tamhane       | 1       | 2             | 0.246                | 0.342      | 0.999 |
|               |         | 3             | −0.125               | 0.331      | 1.00  |
|               |         | 4             | −0.312               | 0.335      | 0.990 |
|               |         | 5             | −0.110               | 0.399      | 1.00  |
|               | 2       | 1             | −0.246               | 0.342      | 0.999 |
|               |         | 3             | −0.370               | 0.138      | 0.080 |
|               |         | 4             | −0.558 **            | 0.148      | 0.003 |
|               |         | 5             | −0.355               | 0.263      | 0.884 |
|               | 3       | 1             | 0.125                | 0.331      | 1.00  |
|               |         | 2             | 0.370                | 0.138      | 0.080 |
|               |         | 4             | −0.188               | 0.120      | 0.730 |
|               |         | 5             | 0.015                | 0.249      | 1.00  |
|               | 4       | 1             | 0.312                | 0.335      | 0.990 |
|               |         | 2             | 0.558 **             | 0.148      | 0.003 |

|   |   |        |       |       |
|---|---|--------|-------|-------|
|   | 3 | 0.187  | 0.120 | 0.730 |
|   | 5 | 0.203  | 0.255 | 0.997 |
| 5 | 1 | 0.110  | 0.399 | 1.00  |
|   | 2 | 0.355  | 0.263 | 0.884 |
|   | 3 | −0.015 | 0.249 | 1.00  |
|   | 4 | −0.203 | 0.255 | 0.997 |

The median-based chi-square tests for age, income, and education scales were 0.360, 0.311, and 0.11, and the significance of their variance results were 0.009, 0.393 and 0.07, respectively. Thus, we performed multiple comparisons of education scale using Tamhane's method for variance heterogeneity in response. We found insignificant results for their willingness to conserve on income scale, while at least one group reached significant levels on age and education scales. Note: \*\*  $p < 0.01$ , \*\*\*  $p < 0.001$ .

**Table S4.** Semi-structured interview contents.

| No. | Items                                                                                                                                                                                                                                                                                          |
|-----|------------------------------------------------------------------------------------------------------------------------------------------------------------------------------------------------------------------------------------------------------------------------------------------------|
| 1   | How much area does your household plant rubber?<br>1a. Have you ever thought of changing rubber land use and then using it to plant other fruit trees or herbal plants with high economic benefits?<br>1b. How much area of rubber land is planned to be changed?                              |
| 2   | Have you ever fished or picked wild edible plants such as wild mushrooms and wild vegetables before?<br>2a. Which one do you prefer?<br>2b. What do you think about protecting them?<br>2c. What are your hobbies in life?<br>2d. how much do you get in return for your annual material gain? |
| 3   | How well do you think local nationalized forests or community forests are protected?<br>3a. Will the unprotected have any impact on your lives?                                                                                                                                                |
| 4   | What is the status of fish in the local rivers?<br>4a. How do you usually catch fish?<br>4b. Is the number of fish now reduced compared to before?                                                                                                                                             |
| 5   | Do you think the future village will affect your living habits when it is well developed?<br>5a. The well-developed means more ways to entertain and relax, so will you participate in it?                                                                                                     |

## Reference

1. Sijtsma, K. On the Use, the Misuse, and the Very Limited Usefulness of Cronbach's Alpha. *Psychometrika* **2008**, *74*, 107.
